# Supplementary material
Source: PubMed Central journal article supplement (PMC3739691)

For online supplement:

### Recruitment Flow for Effectiveness of Switching: Polypharmacy to Monotherapy

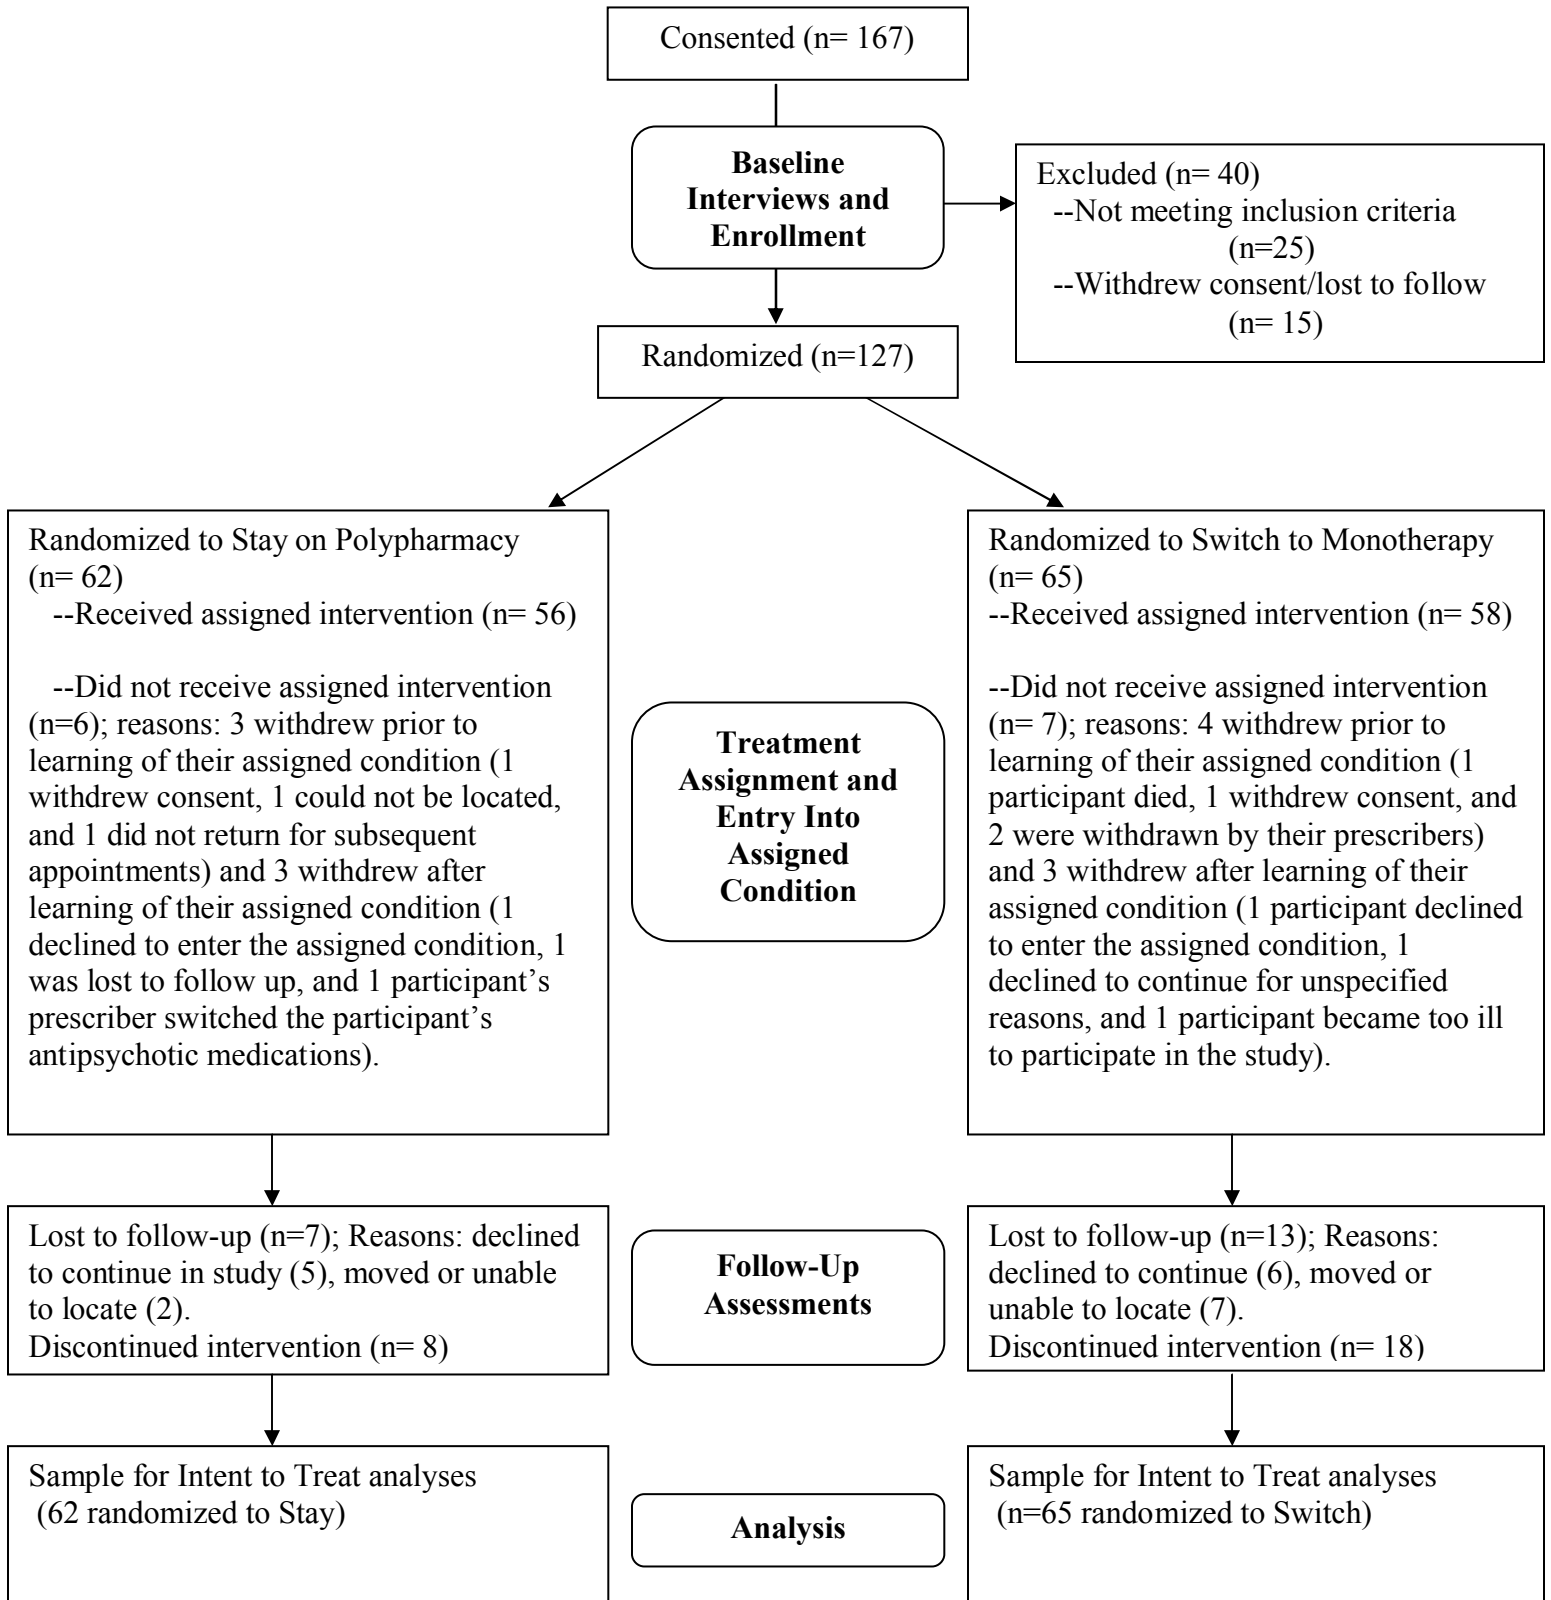

Supplement: NIHMS494901-supplement-01.pdf [file NIHMS494901-supplement-01.pdf]
